# Supplementary material for: Pancreatic acinar differentiation is guided by differential laminin deposition
Source: PubMed Central journal article supplement (PMC6389953; doi:10.1038/s41598-019-39077-6), 2019-02-25
Supplement: 41598_2019_39077_MOESM1_ESM.pdf [file 41598_2019_39077_MOESM1_ESM.pdf]

## Pancreatic acinar differentiation is guided by differential laminin deposition.

Charlotte Heymans, Jonathan Degosserie, Catherine Spourquet & Christophe E. Pierreux

### Supplementary Information

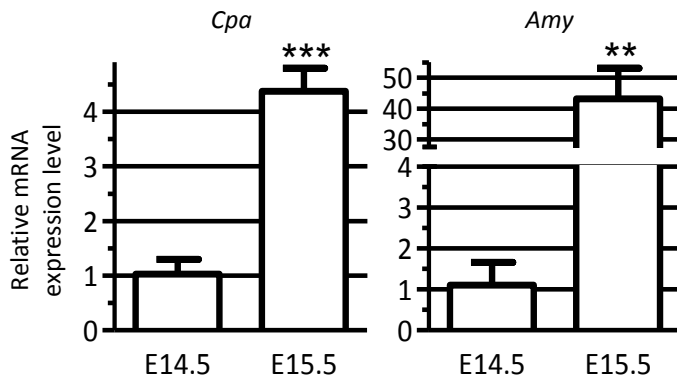

**Figure S1: Acinar differentiation increases from E14.5 to E15.5 *in vivo*.**

RT-qPCR analysis of acinar markers *Cpa* and *Amy* compared to  $\beta$ -actin on E14.5 and E15.5 pancreata. The increase of *Cpa* and *Amy* expression illustrates acinar differentiation. (Student T-test: \*\*,  $p < 0.01$ ; \*\*\*,  $p < 0.001$ ).

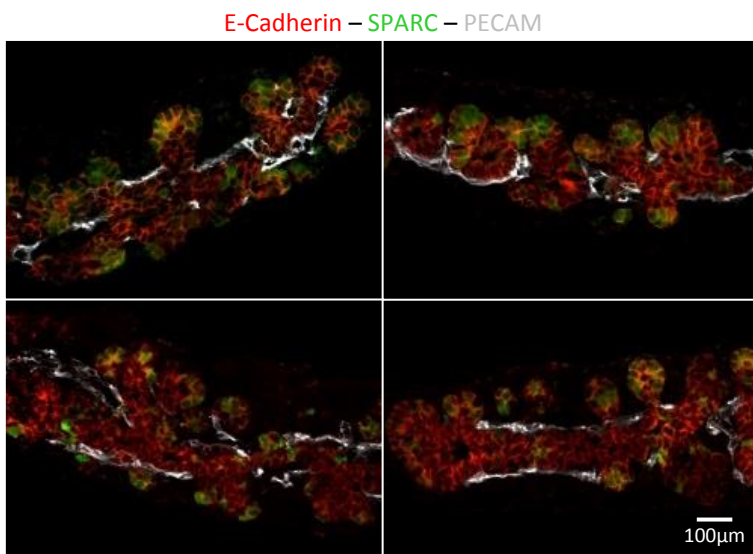

**Figure S2: SPARC is found in developing acini.**

Immunofluorescence for SPARC (green), the pancreatic epithelium marker (E-cadherin, red) and the endothelial marker PECAM (white) in explants at 3 days. SPARC is predominantly found in the epithelial cells located at the periphery of the explant, at a distance of endothelial cells (PECAM<sup>+</sup> cells).

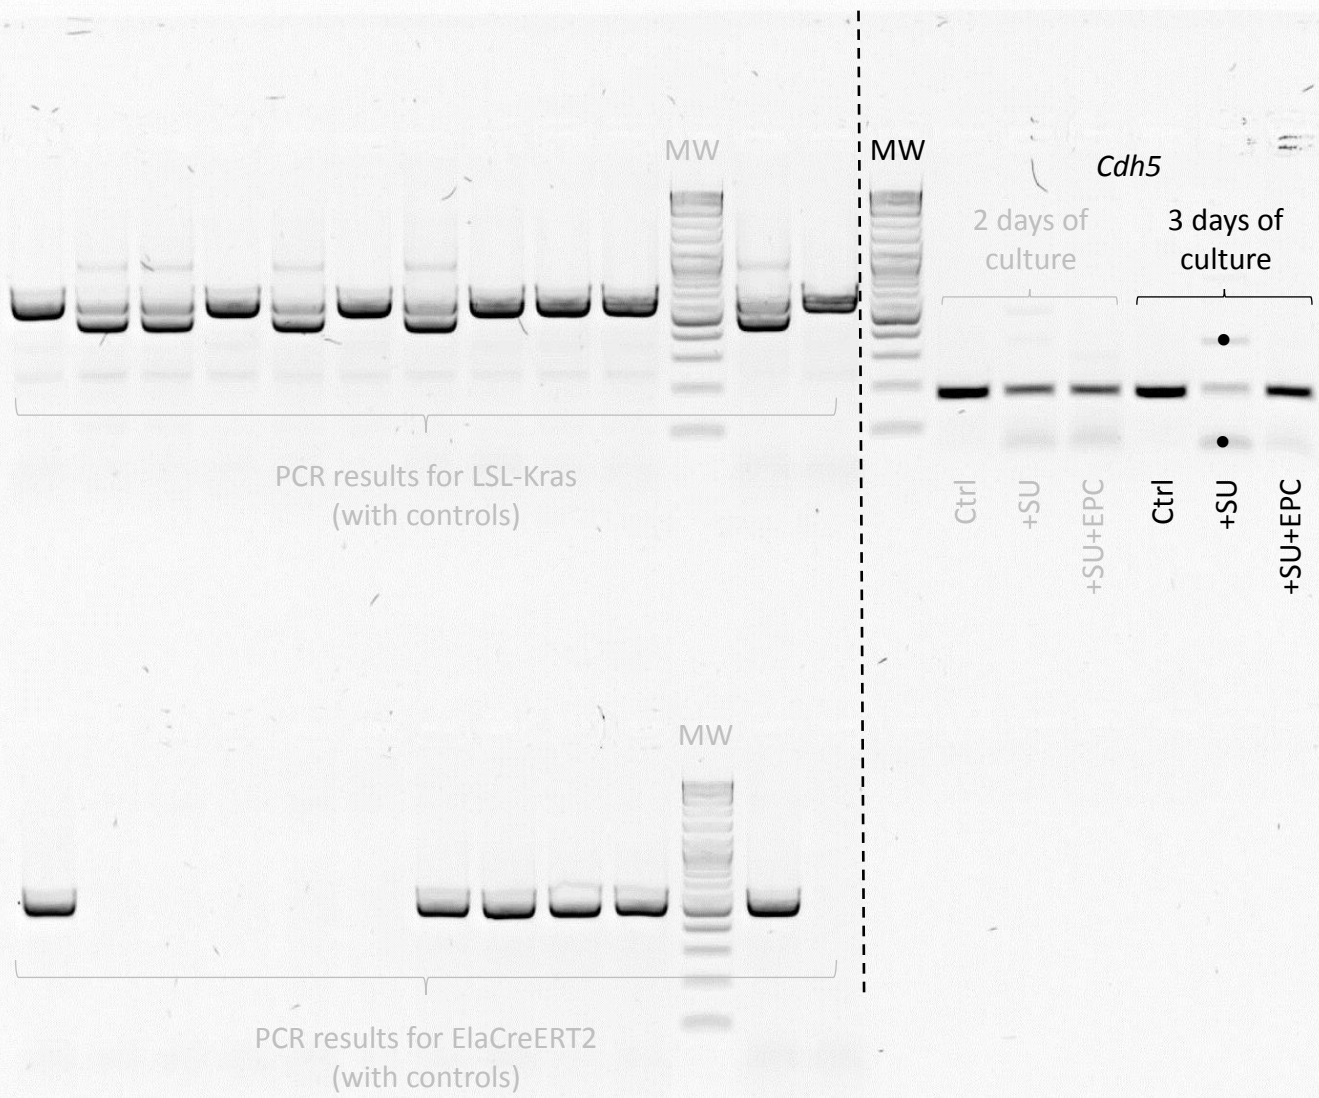

**Figure S3: Full-length gel shown in Figure 2b.**

The left side of the gel contains PCR samples of genotyping experiments (non relevant in this study). The PCR results of *Cdh5* expression measured in explants cultured for 2 and 3 days in control medium (Ctrl), supplemented with SU5416 (+SU) and EPC (+SU+EPC), are found on the right side of the gel.



**Table S1: Primers**

| Primer Name       | Forward Sequence             | Reverse Sequence              | Primer efficiency (%) |
|-------------------|------------------------------|-------------------------------|-----------------------|
| <i>Amy</i>        | 5'-GTGGTCAATGGTCAGCCTTT-3'   | 5'-TTGCCATCGACCTTATCTCC-3'    | 98.8%                 |
| <i>Car2</i>       | 5'-TTGATGACTCTCAGGACAATGC-3' | 5'-CTTGTGAGGCAGGTCCAATCTTC-3' | 98%                   |
| <i>Cdh5</i>       | 5'-GGATGTGGTGCCAGTAAACC-3'   | 5'-ACCCCGTTGTCTGAGATGAG-3'    | 101.22%               |
| <i>Cpa</i>        | 5'-CTCCTGACAAGGAGGAGCTG-3'   | 5'-ATAGTGCTCCCACTGGCTTG-3'    | 76.2%                 |
| <i>E-Cadherin</i> | 5'-AGGGAGCTGTCTACCAAAGTG-3'  | 5'-GGAAACATGAGCAGCTCTGGG-3'   | 96.1%                 |
| <i>Flk-1</i>      | 5'-GCATGGAAGAGGATTCTGGA-3'   | 5'-CGGCTCTTCGCTTACTGTT-3'     | 90.5%                 |
| <i>Gcg</i>        | 5'-GCACATTCACCAGCGACTACA-3'  | 5'-CGGTTCTCTTGGTGTTTCATC-3'   | 88%                   |
| <i>Hnf1b</i>      | 5'-GAAAGCAACGGGAGATCCTC-3'   | 5'-GACTGCCAGGCCCTGGTTCTGT-3'  | 92.2%                 |
| <i>Ins2</i>       | 5'-CAGGTGACCTTCAGACCTT-3'    | 5'-GGGTCTAGTTGCAGTAGTTC-3'    | 95%                   |
| <i>Pecam</i>      | 5'-ATAGGCATCAGTGCCAGTC-3'    | 5'-TCCGCTCTGCACTGGTATTTC-3'   | 91.6%                 |
| <i>Prox1</i>      | 5'-CCGACATCTCACCTTATTAG-3'   | 5'-TGCGAGGTAATGCATCTGTTG-3'   | 104%                  |
| <i>Ptf1a</i>      | 5'-TGCCATCGAGGCACCCGTTTC-3'  | 5'-TGAGCTGTTTTTCATCAGTCCAG-3' | 89.6%                 |
| <i>Rbpj</i>       | 5'-GGTCCCAGACATTTCTGCAT-3'   | 5'-GGAGTTGGCTCTGAGAATCG-3'    | 91.1%                 |
| <i>Rbpjl</i>      | 5'-CAGAGCATGCCATCATCCTA-3'   | 5'-AGTCCCATGTAACCGCAGAC-3'    | 91.1%                 |
| <i>Sox9</i>       | 5'-CAAGACTCTGGGCAAGCTCTG-3'  | 5'-TCCGCTTGTCGTTCTTCAC-3'     | 92.3%                 |
| <i>β-Actin</i>    | 5'-TCCTGAGCGCAAGTACTCTGT-3'  | 5'-CTGATCCACATCTGCTGGAAG-3'   | 100.3%                |

**Table S2: Antibodies**

| Antibody    | Supplier            | Reference | Species     | Dilution | Unmasking | Embedding           |
|-------------|---------------------|-----------|-------------|----------|-----------|---------------------|
| Amylase     | Sigma               | A8273     | rabbit      | 1/300    | +         | gelatin             |
| E-Cadherin  | BD Biosciences      | 610182    | mouse IgG2a | 1/300    | - or +    | paraffin or gelatin |
| Laminin-α1  | gift from T. Sasaki | /         | rabbit      | 1/1,000  | -         | paraffin            |
| pan-Laminin | Sigma               | L9393     | rabbit      | 1/200    | - or +    | gelatin             |
| PECAM       | BD Biosciences      | 550274    | rat         | 1/100    | -         | gelatin             |
| PECAM       | Dianova             | DIA310    | rat         | 1/20     | +         | paraffin            |
| SPARC       | Santa Cruz          | AON-1     | mouse IgG3  | 1/300    | -         | gelatin             |
